# Supplementary material for: Biogenic chitosan–selenium nanoparticles for improved stress resilience in rice seedlings
Source: Royal Society of Chemistry journal article supplement (doi:10.1039/d5nj03475b), 2025-11-27
Supplement: d5nj03475b1.pdf [file d5nj03475b1.pdf]

## Supplementary Information Data

### Biogenic Chitosan–Selenium Nanoparticles for Improved Stress Resilience in Rice Seedlings

Iqra Irshad<sup>1,2,†</sup>, Saira Zaheer<sup>1,†</sup>, Muhammad Faheem Iqbal<sup>1,2</sup>, Muhammad Uzair<sup>2\*</sup>, Sunbal Khalil Chaudhari<sup>3</sup>, Muhammad Ramzan Khan<sup>1,2</sup>, Murtaza Hasan<sup>4\*</sup>, Ghazala Mustafa<sup>1\*</sup>

<sup>1</sup>Department of Plant Sciences, Faculty of Biological Sciences, Quaid-i-Azam University, Islamabad 45320, Pakistan

<sup>2</sup>National Institute for Genomics and Advanced Biotechnology (NIGAB), NARC, Park Road-45500, Islamabad, Pakistan.

<sup>3</sup>Institute of Molecular Biology and Biotechnology, The University of Lahore, Sargodha Campus, Sargodha 42100, Pakistan

<sup>4</sup>Department of Biotechnology, Faculty of Chemical and Biological Sciences, The Islamia University of Bahawalpur, Bahawalpur, 63100, Pakistan

#### \*Corresponding Author

#### Murtaza Hasan

Department of Biotechnology,  
Faculty of Chemical and Biological Sciences,  
The Islamia University of Bahawalpur, Bahawalpur 63100, Pakistan.

Email: [murtaza@iub.edu.pk](mailto:murtaza@iub.edu.pk)

<sup>†</sup> These authors contributed equally.

#### Ghazala Mustafa

Department of Plant Sciences, Faculty of Biological Sciences,  
Quaid-i-Azam University, Islamabad 45320, Pakistan.

Email: [mghazala@qau.edu.pk](mailto:mghazala@qau.edu.pk)

Tel: +92-51-90643187

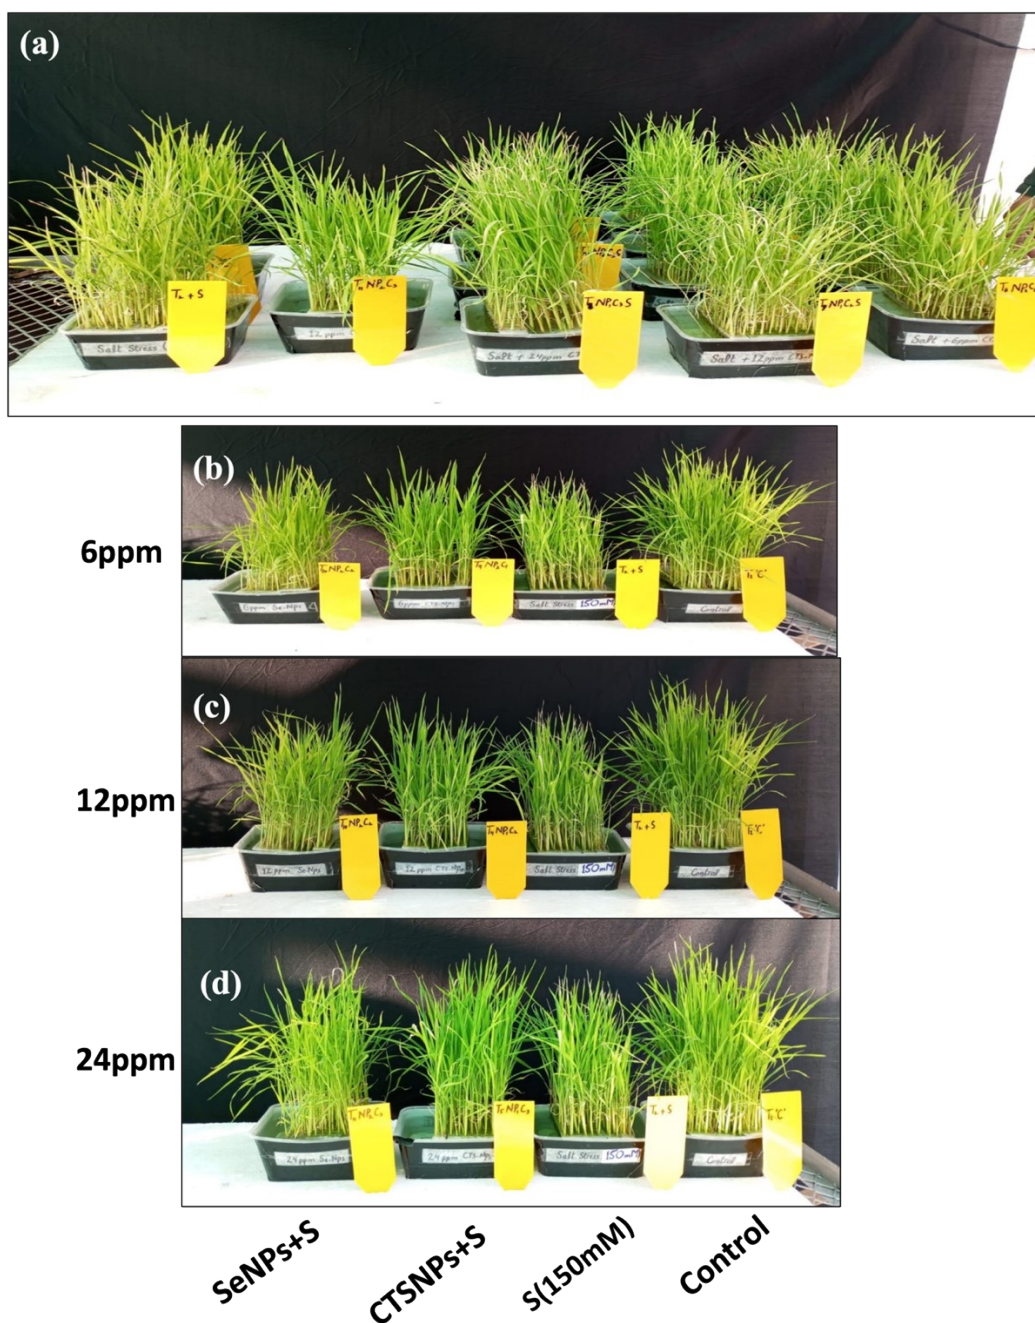

**Fig.S1.** Comparison of different concentrations of SeNPs & CTSNPs with 150mM salt on *Oryza sativa* before harvesting (a). Complete experiment (b). 6ppm (SeNPs & CTSNPs) (c). 12ppm (SeNPs & CTSNPs) (d). 24ppm (SeNPs & CTSNPs).

Table S1

| Parameters                                   | Se-NPs                                                        | CTS-NPs                                                          |
|----------------------------------------------|---------------------------------------------------------------|------------------------------------------------------------------|
| <b>(a) UV-Vis Spectra</b>                    |                                                               |                                                                  |
| Peak range                                   | 260-280 nm                                                    | 280-300 nm                                                       |
| Absorption Peak                              | Sharp and well-defined (plasmon resonance)                    | Broad peaks (less pronounced plasmon band)                       |
| Interpretation                               | Indicates nanoparticle formation and a smaller size           | Suggests a polymeric structure with embedded or coated particles |
| <b>(b) FTIR analysis (Functional groups)</b> |                                                               |                                                                  |
| -OH, -NH                                     | Present from plant extract as a reducing/ capping agent       | Strong signals from the chitosan backbone                        |
| C=O, C=C                                     | From phytochemicals (phenolics, Flavonoids)                   | May arise due to minor modifications or additives                |
| Se-O or Se=O (if oxidized)                   | Weak peak may appear ( $\sim 600\text{-}700\text{ cm}^{-1}$ ) | Absent                                                           |
| C-N, C-O                                     | Possible with capping agents                                  | Strong, from the Chitosan structure                              |
| <b>(c) XRD Diffraction Pattern</b>           |                                                               |                                                                  |
| Crystallinity                                | Highly distinct peaks indicate a crystalline nature           | Low-broad halo pattern indicating amorphous structure            |
| 2 $\theta$ Peaks                             | Characteristics peaks of elemental Se (e.g., 23°, 30°, 43°)   | Broad peak around 20° (typical of chitosan)                      |
| <b>(d) DLS (Dynamic Light Scattering)</b>    |                                                               |                                                                  |
| Size range                                   | Typically, 30-100 nm                                          | Typically, 100-200 nm                                            |
| Polydispersity Index                         | Low to moderate (0.2-0.4)                                     | Higher (0.3-0.6), due to polymer aggregation                     |
| Zeta potential                               | -20 to -30 mV (moderate stability)                            | +30 to +40 mV (cationic chitosan provides high stability)        |
| <b>(e) SEM Imaging (Morphology)</b>          |                                                               |                                                                  |

|                                                                              |                                      |                                                  |
|------------------------------------------------------------------------------|--------------------------------------|--------------------------------------------------|
| Shape                                                                        | Spherical or slightly irregular      | Rough, semi-spherical, or irregular              |
| Surface Texture                                                              | Smooth and slightly agglomerated     | Dense and compact polymeric surface              |
| Particle Size                                                                | 30-80 nm (individual), some clusters | 100-200 nm (due to chitosan matrix)              |
| <b>(f) EDS (Energy Dispersive X-ray Spectroscopy) (Key element Detected)</b> |                                      |                                                  |
| Selenium (Se)                                                                | Strong, confirming elemental Se      | Absent                                           |
| C, O                                                                         | Present due to the organic matrix    | Present in Higher amounts (from Chitosan)        |
| N                                                                            | Trace or absent                      | Prominent due to chitosan                        |
| Other elements                                                               | Possible residual (Na, Cl)           | Possibly Na, P, or crosslinking ions (e.g., TPP) |
| <b>Summary of Difference</b>                                                 |                                      |                                                  |
| Structure                                                                    | Metallic, Crystalline                | Polymeric, mostly amorphous                      |
| Stability                                                                    | Moderate (negatively charged)        | High (positively charged due to chitosan)        |
| Size                                                                         | Smaller (30-100 nm)                  | Larger (100-200 nm)                              |
| Elemental profile                                                            | Rich in Se                           | Rich in C, N, O (from Chitosan)                  |
| Application Stability                                                        | Redox activity, stress mitigation    | Controlled release, biocompatibility             |
